# Supplementary material
Source: PubMed Central journal article supplement (PMC4989311)
Supplement: ismej201620x1.pdf [file ismej201620x1.pdf]

# Table S1

| Size fraction       | Lineage                          | Clade (SILVA annotation)     | Percent abundance in 16S libraries (experiment and control) per size fraction | BD shift                 | Percent of genomes in clade or lineage that encode TonB receptor proteins |       |
|---------------------|----------------------------------|------------------------------|-------------------------------------------------------------------------------|--------------------------|---------------------------------------------------------------------------|-------|
| 0.2 - 0.8           | Euryarchaeota (MGII)             | MGII.A                       | 0.1656                                                                        | 0.012                    | No representative genome                                                  |       |
|                     |                                  | MGII.C                       | 0.1523                                                                        | 0.012                    |                                                                           |       |
|                     | Actinobacteria                   | Sva0096                      | 0.9712                                                                        | 0.018                    | 100% (1/1)                                                                |       |
|                     |                                  |                              | 0.0339                                                                        | 0.012                    |                                                                           |       |
|                     | Actinobacteria                   | Sva0096                      | 0.0160                                                                        | 0.012                    | 62% (13/21)                                                               |       |
|                     | Flavobacteria                    | NS9 marine group             | 0.0290                                                                        | 0.018                    | 100% (7/7)                                                                |       |
|                     | Gammaproteobacteria              | SAR86                        | 0.0142                                                                        | 0.018                    | 88% (7/8)                                                                 |       |
|                     |                                  |                              | 5.3838                                                                        | 0.012                    |                                                                           |       |
|                     |                                  |                              | 0.0412                                                                        | 0.036                    |                                                                           |       |
|                     | Alphaproteobacteria              | Uncultured Rhodobacteraceae  | 0.5947                                                                        | 0.012                    | 100% (2/2)                                                                |       |
| 0.0712              |                                  |                              | 0.018                                                                         |                          |                                                                           |       |
| Verrucomicrobia     | Uncultured Puniceicoccaceae      | 0.6991                       | 0.012                                                                         | 35% (48/136)             |                                                                           |       |
|                     |                                  | 0.1873                       | 0.024                                                                         |                          |                                                                           |       |
| 0.8 - 3             | Euryarchaeota (MGII)             | MGII.A                       | 0.1504                                                                        | 0.012                    | 100% (1/1)                                                                |       |
|                     |                                  | 0.0043                       | 0.012                                                                         |                          |                                                                           |       |
|                     | Flavobacteria                    | Uncultured Flavobacteriaceae | 0.0096                                                                        | 0.012                    | No representative genome                                                  |       |
|                     |                                  |                              | 0.0155                                                                        | 0.030                    |                                                                           |       |
|                     |                                  |                              | 0.0038                                                                        | 0.018                    |                                                                           |       |
|                     |                                  |                              | <i>Formosa</i> sp.                                                            | 0.0048                   |                                                                           | 0.030 |
|                     |                                  |                              | <i>Marinoscillum</i> sp.                                                      | 0.0018                   |                                                                           | 0.030 |
|                     |                                  |                              | NS11-12 marine group                                                          | 0.0005                   |                                                                           | 0.042 |
|                     |                                  |                              | NS7 marine group                                                              | 0.0407                   |                                                                           | 0.030 |
|                     | Cyanobacteria                    | <i>Prochlorococcus</i>       | 0.1111                                                                        | 0.024                    | 100% (7/7)                                                                |       |
| 1.4927              |                                  |                              | 0.012                                                                         |                          |                                                                           |       |
| Planctomycetes      | CL500-3                          | 0.3434                       | 0.012                                                                         | 25% (6/24)               |                                                                           |       |
|                     |                                  | 0.0009                       | 0.018                                                                         |                          |                                                                           |       |
| Alphaproteobacteria | SAR116 clade                     | 0.0943                       | 0.024                                                                         | 25% (1/4)                |                                                                           |       |
|                     |                                  | 0.0109                       | 0.018                                                                         |                          |                                                                           |       |
| Deltaproteobacteria | Uncultured Rhodobacteraceae      | 0.0022                       | 0.012                                                                         | 50% (4/8)                |                                                                           |       |
|                     |                                  | 0.0022                       | 0.018                                                                         |                          |                                                                           |       |
| Gammaproteobacteria | GR-WP33-58                       | 0.0008                       | 0.012                                                                         | 35% (48/136)             |                                                                           |       |
|                     |                                  | 0.0439                       | 0.012                                                                         |                          |                                                                           |       |
| Verrucomicrobia     | OM60 clade                       | 0.0628                       | 0.018                                                                         | No representative genome |                                                                           |       |
|                     |                                  | 0.0467                       | 0.024                                                                         |                          |                                                                           |       |
| Deltaproteobacteria | <i>Bdellovibrio</i> (OM27 clade) | 0.0017                       | 0.018                                                                         | 100% (5/5)               |                                                                           |       |
|                     |                                  | 0.1218                       | 0.012                                                                         |                          |                                                                           |       |
| Gammaproteobacteria | KI89A clade                      | 0.0030                       | 0.012                                                                         | 100% (1/1)               |                                                                           |       |
|                     |                                  | 0.0066                       | 0.030                                                                         |                          |                                                                           |       |
| Verrucomicrobia     | Uncultured Puniceicoccaceae      | 0.0089                       | 0.012                                                                         | 100% (1/1)               |                                                                           |       |
|                     |                                  | 0.0020                       | 0.012                                                                         |                          |                                                                           |       |
| Verrucomicrobia     | <i>Roseibacillus</i> sp.         | 0.0015                       | 0.012                                                                         | 100% (1/1)               |                                                                           |       |
|                     |                                  | 0.3558                       | 0.024                                                                         |                          |                                                                           |       |
| Actinobacteria      | OCS155 marine group              | 0.1492                       | 0.018                                                                         | 100% (1/1)               |                                                                           |       |
|                     |                                  | 0.0012                       | 0.018                                                                         |                          |                                                                           |       |
| Actinobacteria      | OCS155 marine group              | 0.6234                       | 0.012                                                                         | 62% (13/21)              |                                                                           |       |
|                     |                                  | 0.0430                       | 0.012                                                                         |                          |                                                                           |       |
| Flavobacteria       | <i>Fluviicola</i> sp.            | 7.3527                       | 0.024                                                                         | 100% (1/1)               |                                                                           |       |
|                     |                                  | 0.0694                       | 0.024                                                                         |                          |                                                                           |       |
| Flavobacteria       | <i>Formosa</i> sp.               | 0.0131                       | 0.024                                                                         | 100% (2/2)               |                                                                           |       |
|                     |                                  | 0.0052                       | 0.018                                                                         |                          |                                                                           |       |
| Flavobacteria       | NS2b marine group                | 0.0031                       | 0.018                                                                         | 100% (7/7)               |                                                                           |       |
|                     |                                  | 0.0018                       | 0.024                                                                         |                          |                                                                           |       |
| Flavobacteria       | NS9 marine group                 | 0.0106                       | 0.018                                                                         | 100% (1/1)               |                                                                           |       |
|                     |                                  | 0.0068                       | 0.018                                                                         |                          |                                                                           |       |
| Flavobacteria       | NS9 marine group                 | 0.0103                       | 0.018                                                                         | 100% (7/7)               |                                                                           |       |
|                     |                                  | 1.9789                       | 0.018                                                                         |                          |                                                                           |       |
| Flavobacteria       | NS9 marine group                 | 1.4731                       | 0.024                                                                         | 100% (7/7)               |                                                                           |       |
|                     |                                  | 0.0061                       | 0.024                                                                         |                          |                                                                           |       |
| Flavobacteria       | NS9 marine group                 | 0.0051                       | 0.018                                                                         | 100% (1/1)               |                                                                           |       |
|                     |                                  | 0.0022                       | 0.018                                                                         |                          |                                                                           |       |
| Flavobacteria       | <i>Owenweeksia</i> sp.           | 1.0545                       | 0.012                                                                         | 100% (1/1)               |                                                                           |       |
|                     |                                  | 0.9138                       | 0.018                                                                         |                          |                                                                           |       |
| Planctomycetes      | CL500-3                          | 0.2098                       | 0.012                                                                         | 25% (1/4)                |                                                                           |       |
|                     |                                  | 0.0327                       | 0.012                                                                         |                          |                                                                           |       |
| Alphaproteobacteria | Erythrobacteraceae               | 0.0122                       | 0.012                                                                         | 100% (8/8)               |                                                                           |       |
|                     |                                  | 0.0042                       | 0.012                                                                         |                          |                                                                           |       |
| Deltaproteobacteria | <i>Oceanicola</i> sp. YCWB25     | 0.0055                       | 0.012                                                                         | 100% (1/1)               |                                                                           |       |
|                     |                                  | 0.0055                       | 0.012                                                                         |                          |                                                                           |       |
| Deltaproteobacteria | Myxococcales                     | 0.0055                       | 0.012                                                                         | 100% (4/4)               |                                                                           |       |
|                     |                                  | 0.0055                       | 0.012                                                                         |                          |                                                                           |       |
| Deltaproteobacteria | <i>Bdellovibrio</i> (OM27 clade) | 0.0915                       | 0.012                                                                         | 100% (5/5)               |                                                                           |       |
|                     |                                  | 0.0915                       | 0.012                                                                         |                          |                                                                           |       |
| Verrucomicrobia     | Puniceicoccaceae                 | 0.0037                       | 0.012                                                                         | 100% (1/1)               |                                                                           |       |
|                     |                                  | 0.0030                       | 0.012                                                                         |                          |                                                                           |       |
| Verrucomicrobia     | <i>Roseibacillus</i> sp.         | 0.7732                       | 0.018                                                                         | 66% (11/16)              |                                                                           |       |
|                     |                                  | 0.0030                       | 0.018                                                                         |                          |                                                                           |       |
| Verrucomicrobia     | <i>Roseibacillus</i> sp.         | 0.0015                       | 0.018                                                                         | 66% (11/16)              |                                                                           |       |
|                     |                                  | 0.0050                       | 0.012                                                                         |                          |                                                                           |       |
| Verrucomicrobia     | <i>Roseibacillus</i> sp.         | 0.0044                       | 0.012                                                                         | 66% (11/16)              |                                                                           |       |
|                     |                                  | 3.4850                       | 0.012                                                                         |                          |                                                                           |       |
