# Supplementary material
Source: PubMed Central journal article supplement (PMC4989311)

# Figure S1

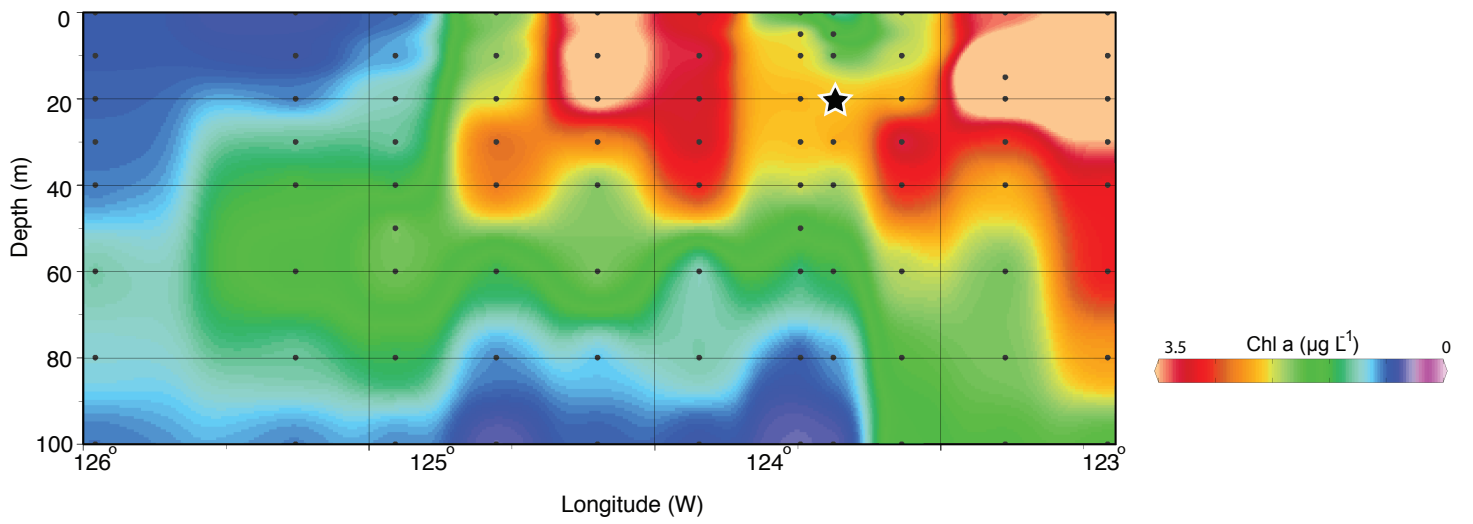

Supplement: ismej201620x2.pdf [file ismej201620x2.pdf]

# Figure S2

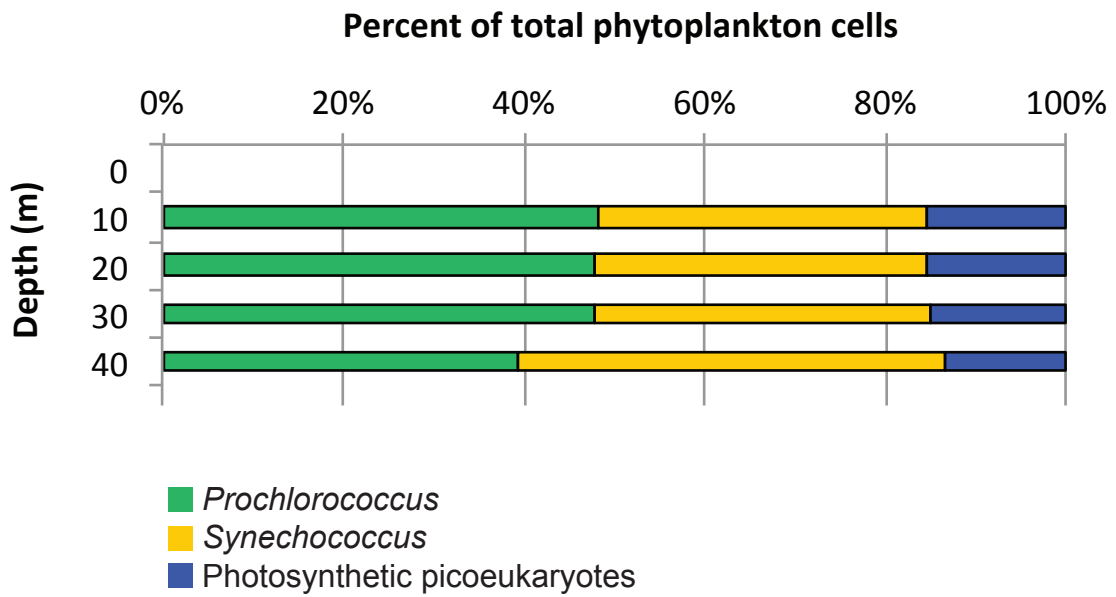

Supplement: ismej201620x3.pdf [file ismej201620x3.pdf]

# Figure S3

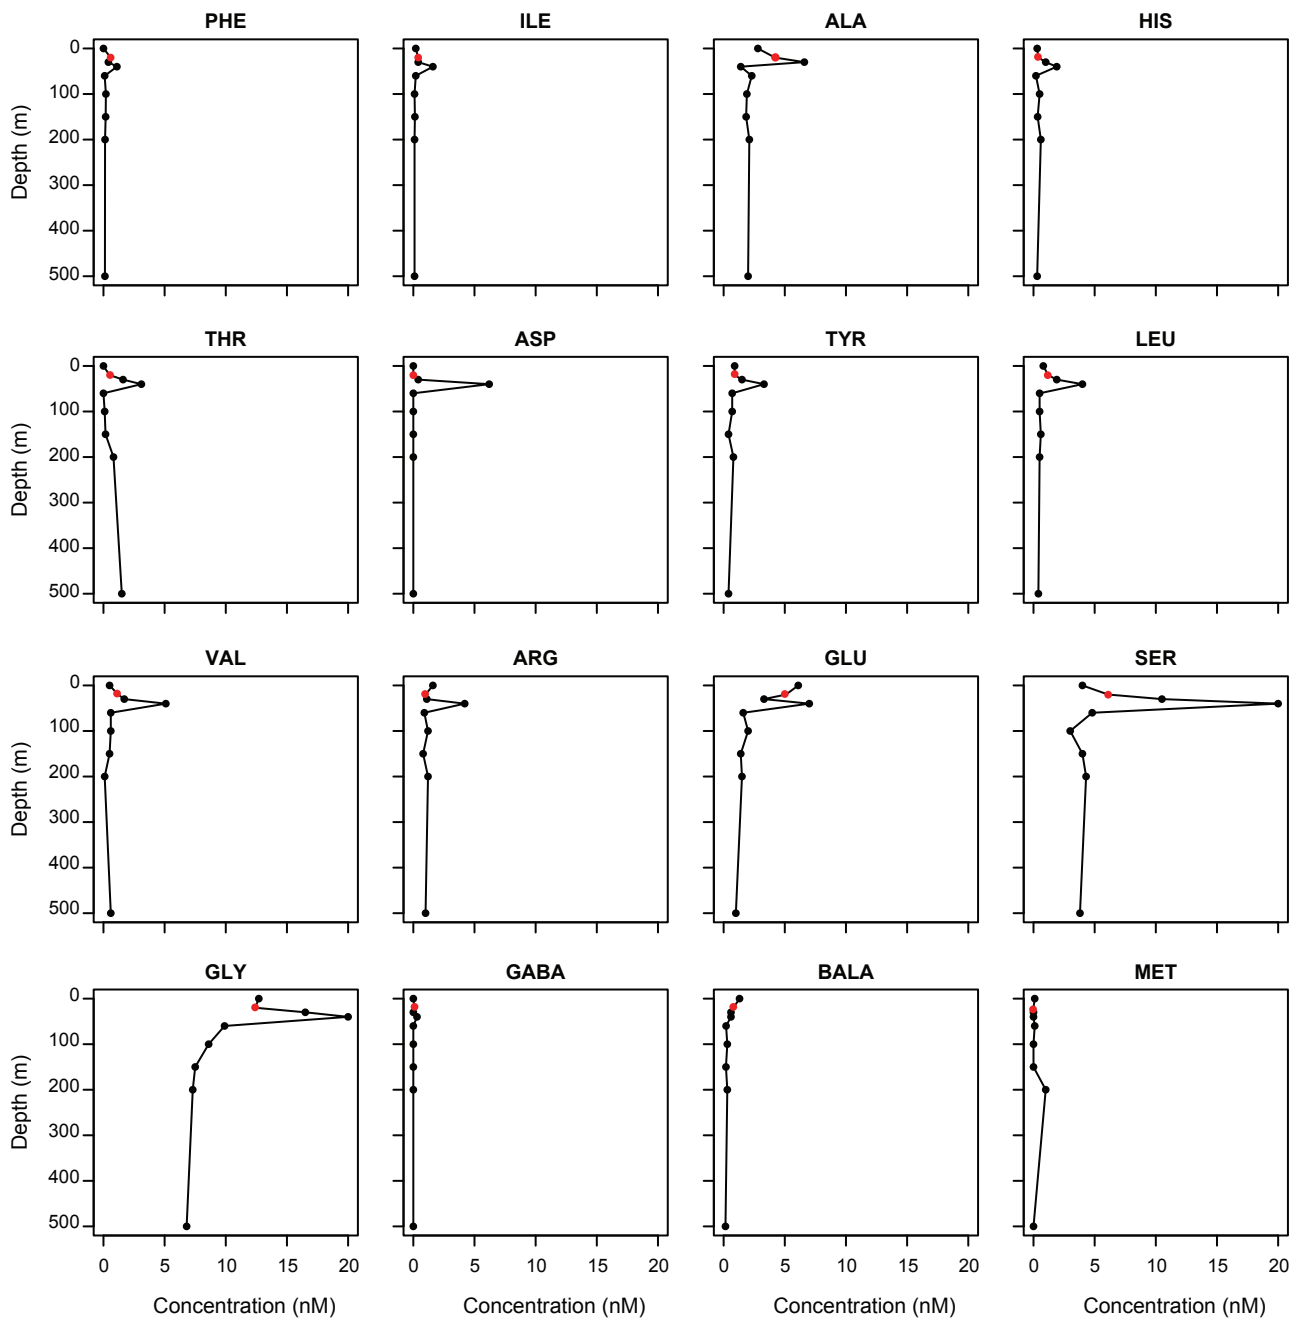

Supplement: ismej201620x4.pdf [file ismej201620x4.pdf]

# Figure S4

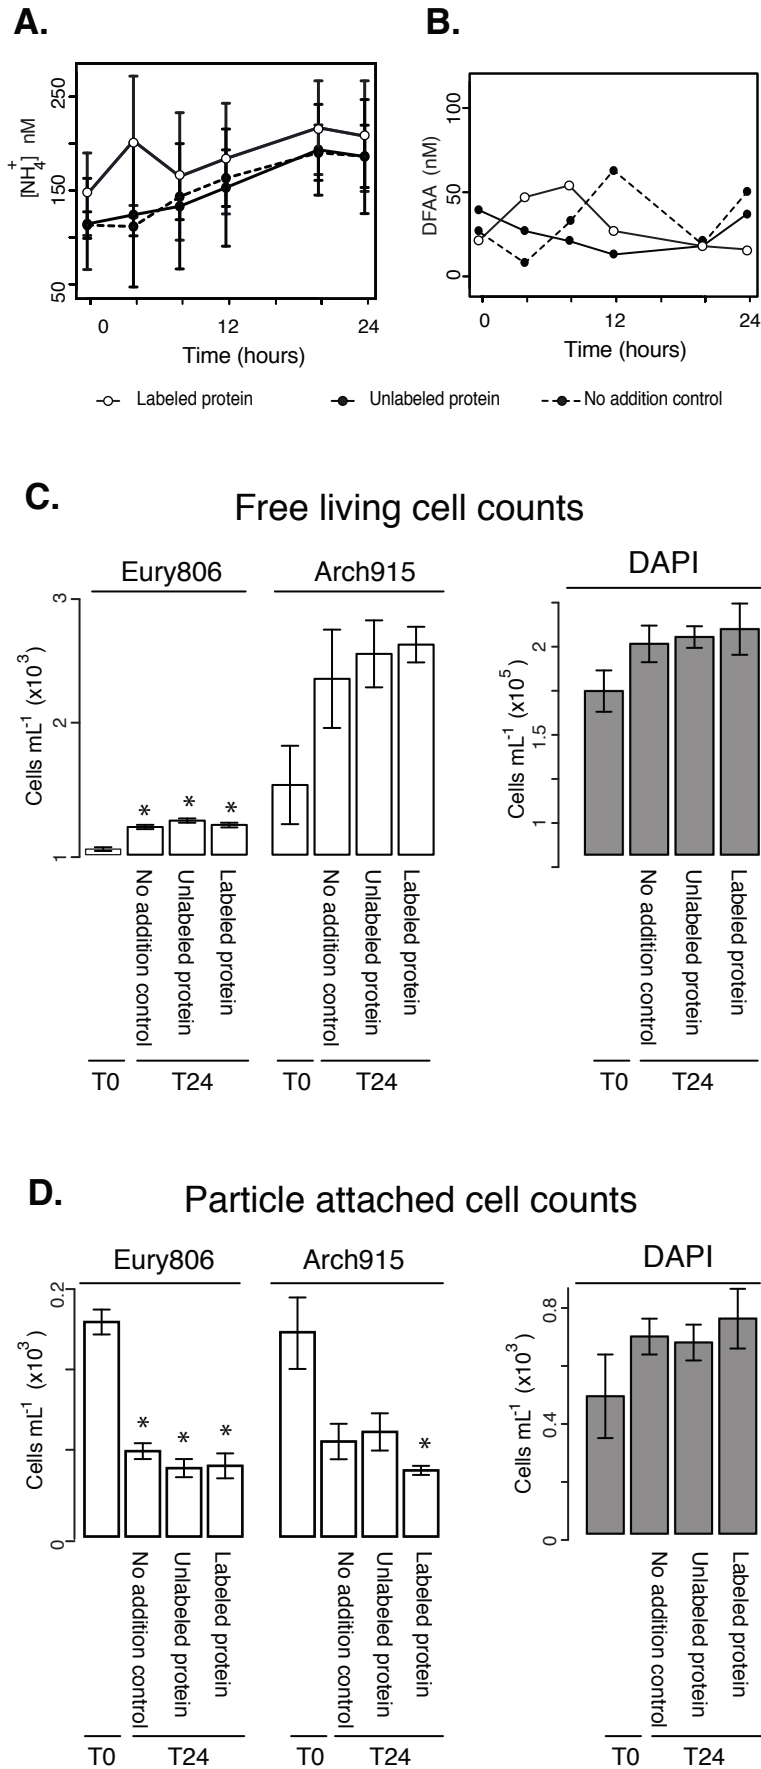

Supplement: ismej201620x5.pdf [file ismej201620x5.pdf]

# Figure S5

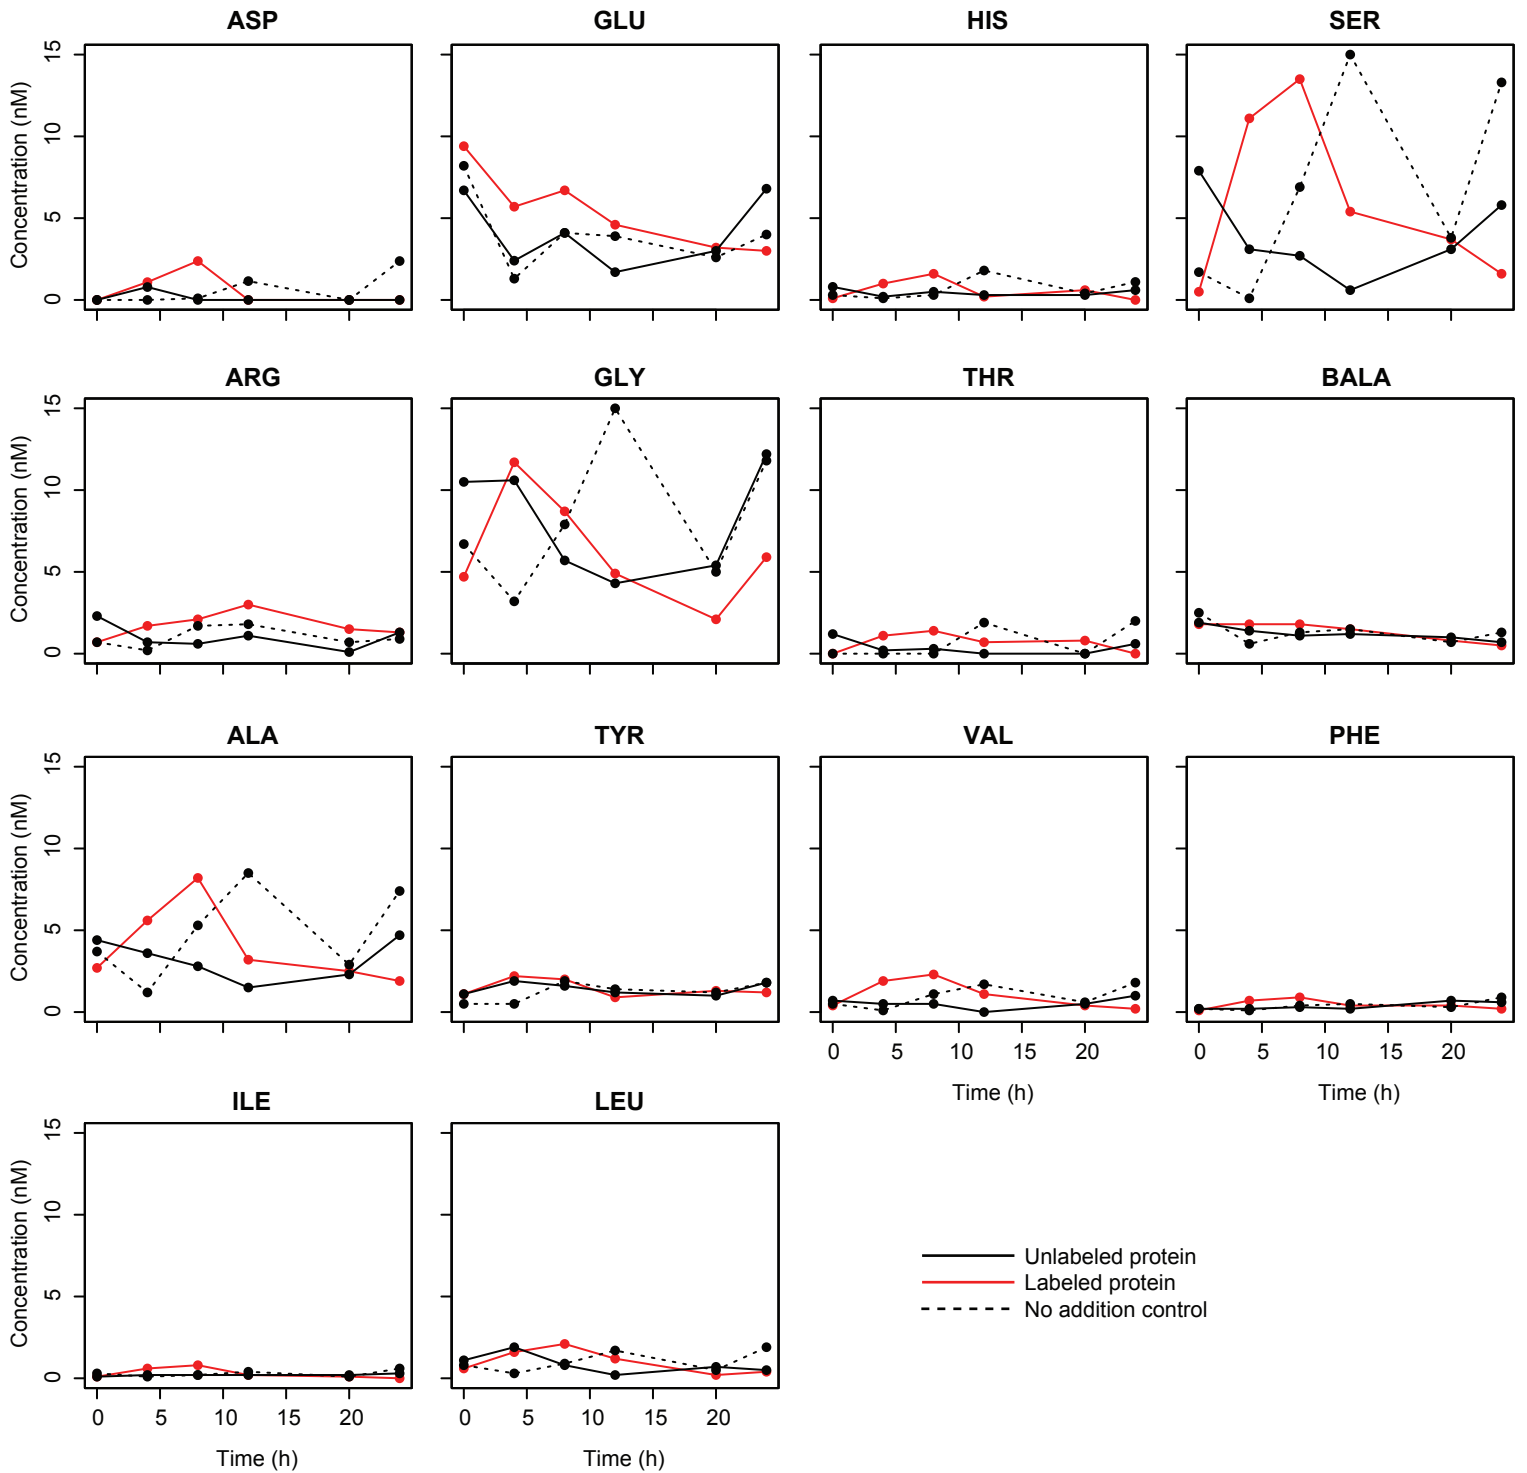

Supplement: ismej201620x6.pdf [file ismej201620x6.pdf]

**Figure S6**

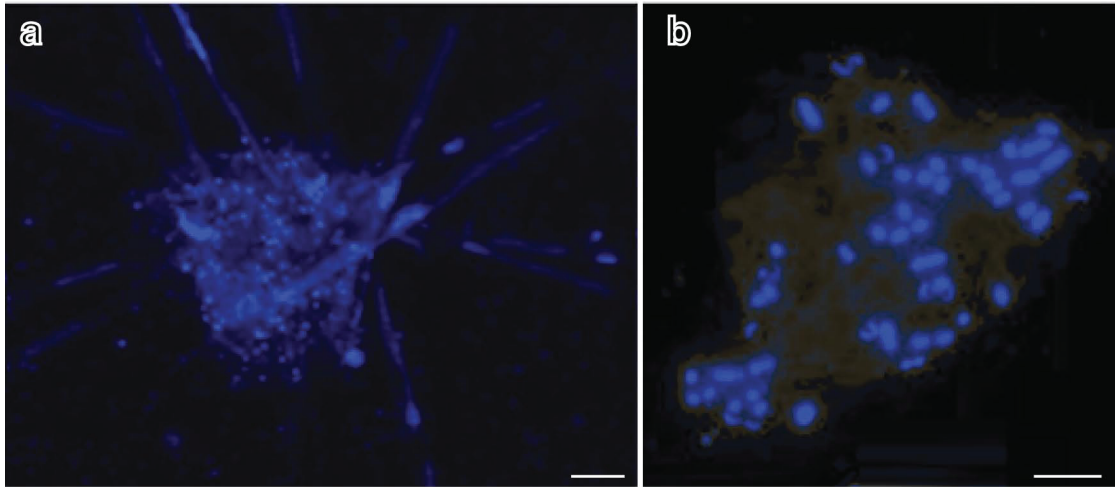

Supplement: ismej201620x7.pdf [file ismej201620x7.pdf]

# Figure S7

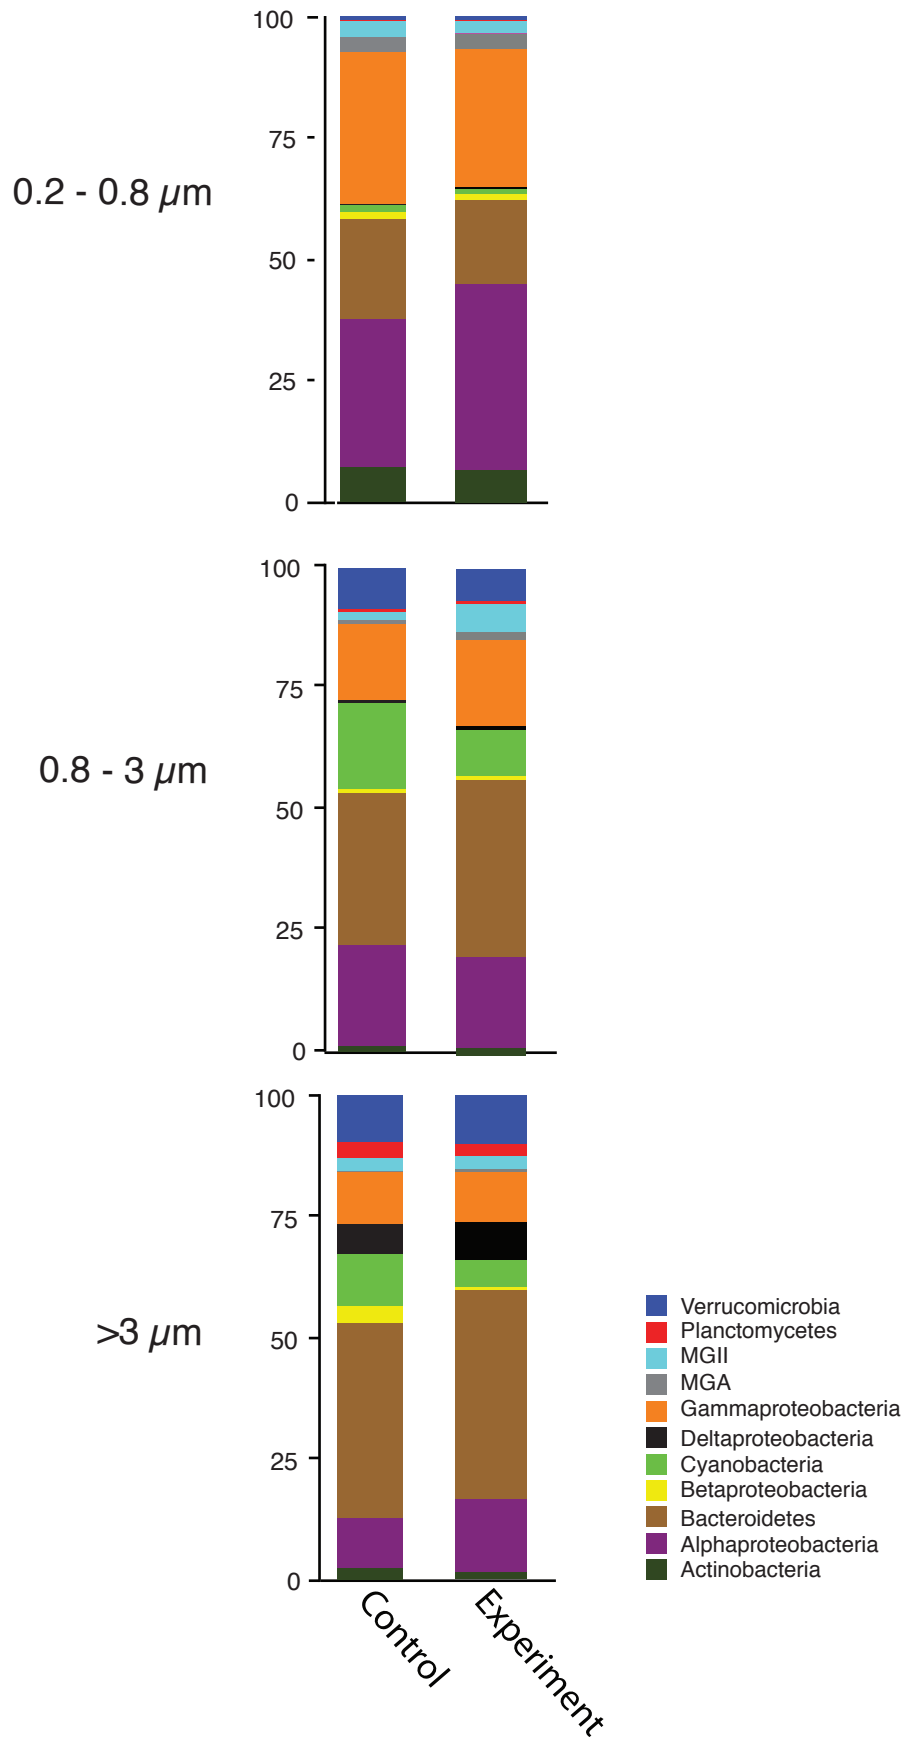

Supplement: ismej201620x8.pdf [file ismej201620x8.pdf]

# Figure S8

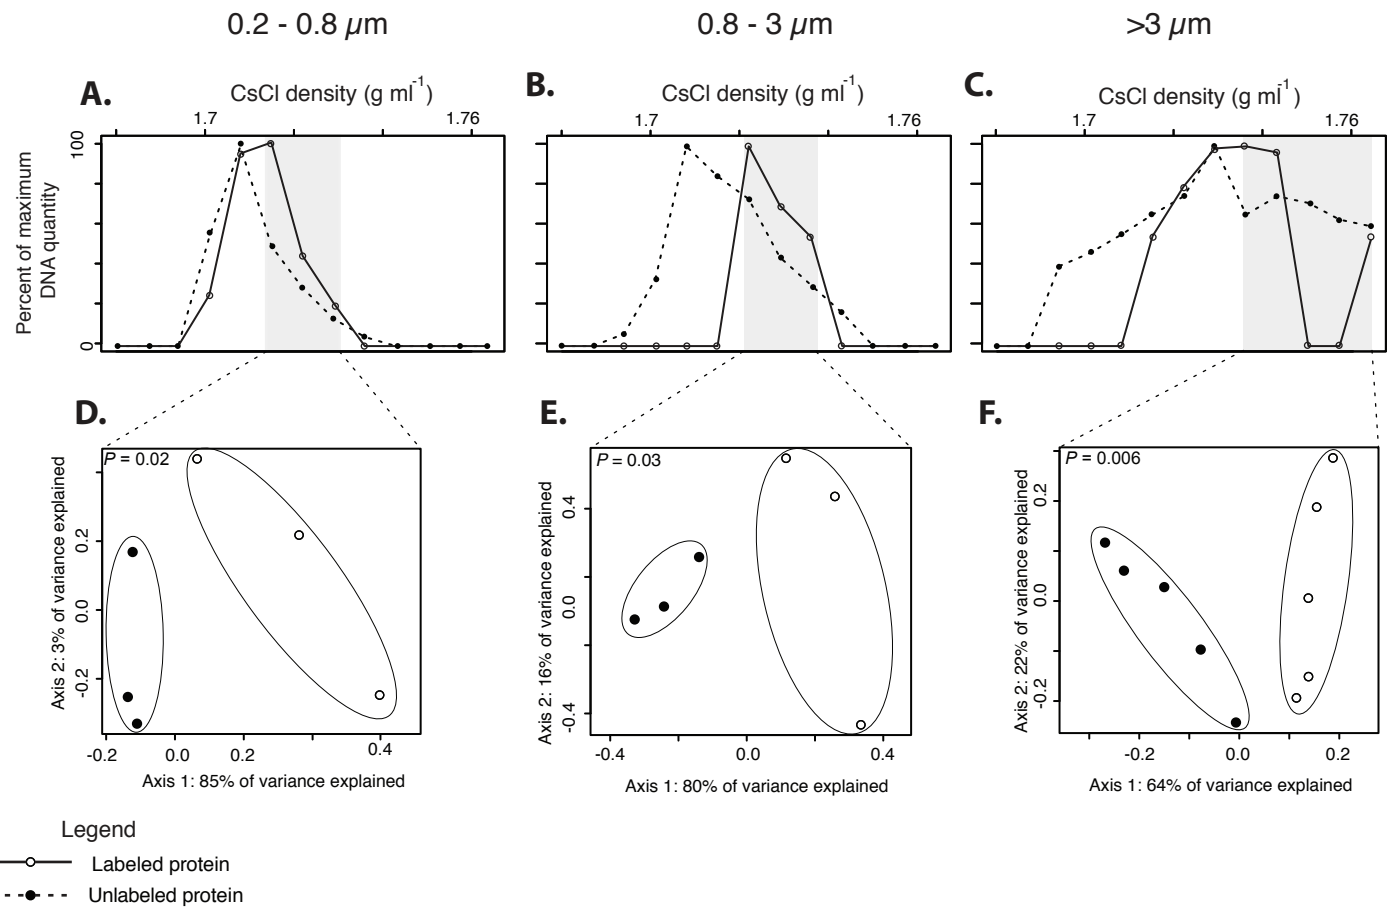

Supplement: ismej201620x9.pdf [file ismej201620x9.pdf]
